# Supplementary material for: Starvation stress during larval development facilitates an adaptive response in adult worker honey bees (Apis mellifera L.)
Source: Oxford University Press journal article supplement (doi:10.1242/jeb.130435), 2016-03-31
Supplement: jeb130435supp.pdf [file jeb130435supp.pdf]

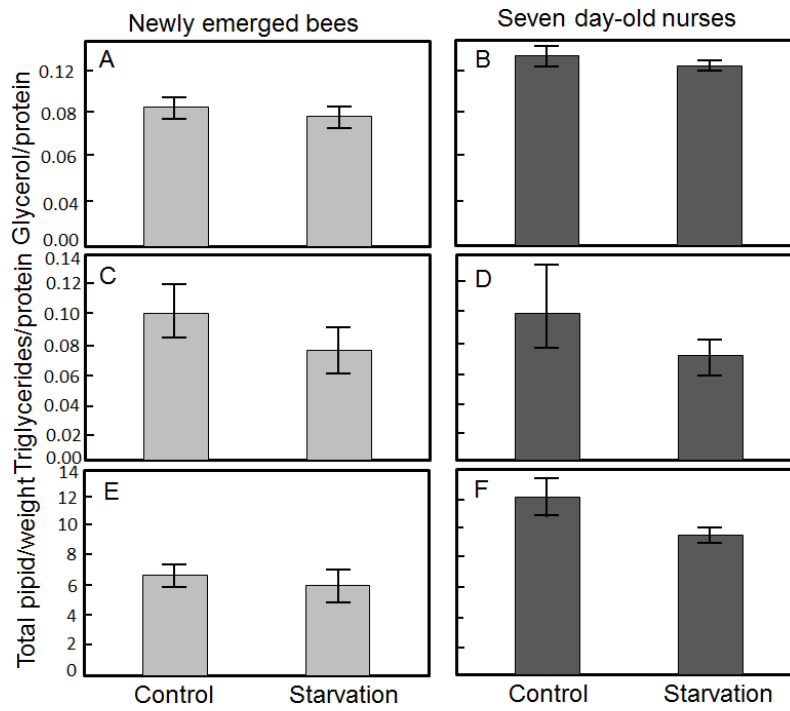

**Fig. S1.** Effect of larval starvation on fat body glycerol, triglycerides and total lipid of < 24h bees and 7-day-old nurses. The values presented are means  $\pm$  se. Statistical significance was analyzed by the two-tailed t test.

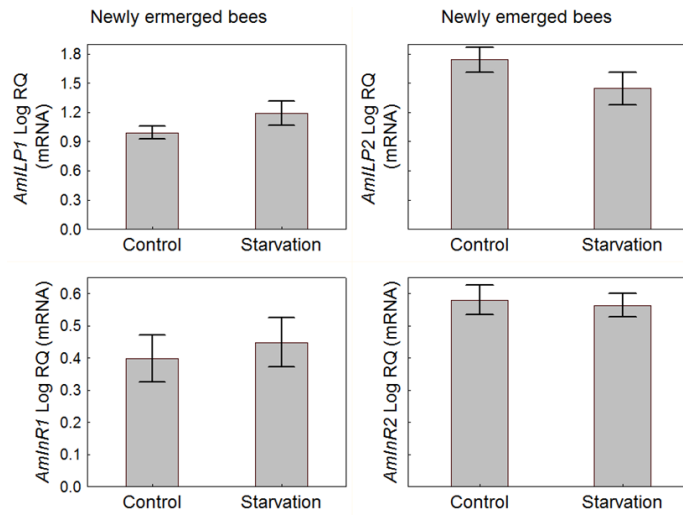

**Fig. S2.** Effect of larval starvation on gene expression of *AmIlp1*, *AmIlp2*, *AmInR1* and *AmInR2* of < 24h bees. The values presented are means  $\pm$  se. Statistical significance was analyzed by the two-tailed t test.

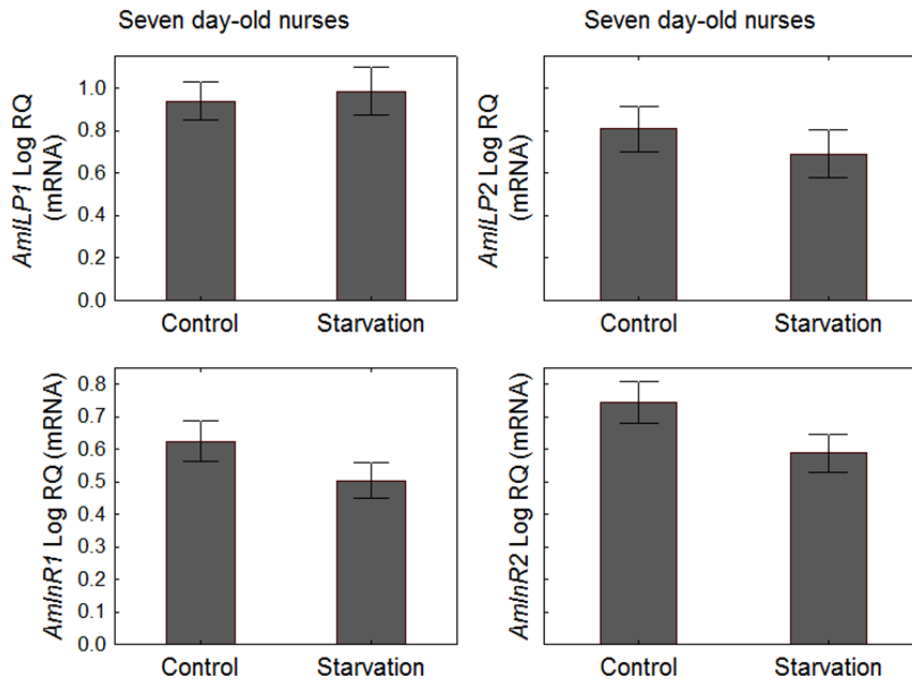

**Fig. S3.** Effect of larval starvation on gene expression of *Amilp1*, *Amilp2*, *AmlnR1* and *AmlnR2* of 7-day-old nurses. The values presented are means  $\pm$  se. Statistical significance was analyzed by the two-tailed t test.

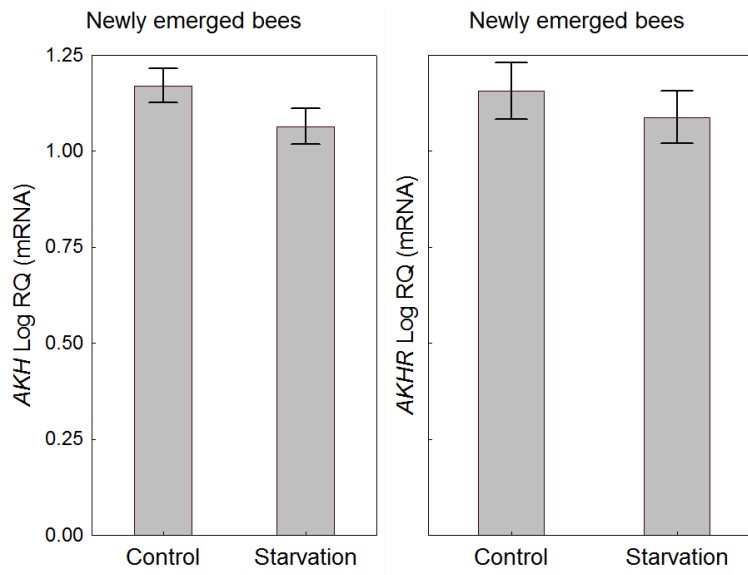

**Fig. S4.** Effect of larval starvation on gene expression of *AKH* and *AKHR* of < 24h bees. The values presented are the mean  $\pm$  se. Statistical significance was analyzed by the two-tailed t test.

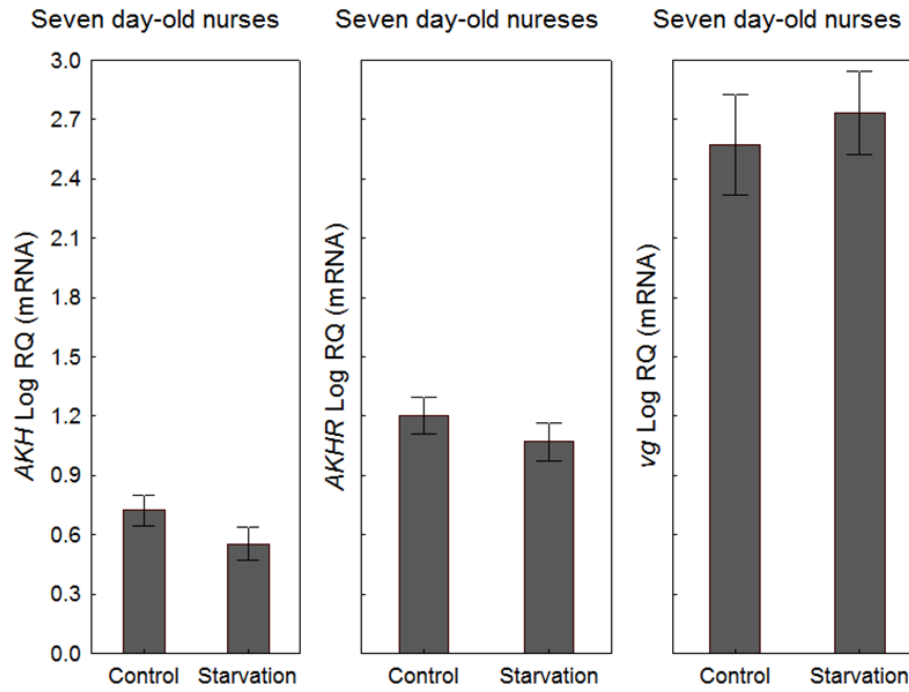

**Fig. S5.** Effect of larval starvation on gene expression of *AKH*, *AKHR* and *vg* of 7-day-old nurses. The values presented are mean  $\pm$  se. Statistical significance was analyzed by the two-tailed t test.

**Table S1:** Statistical results of candidate gene expression

| Student's<br>t-test | < 24 h             |        |       | 7 d old            |        |       |
|---------------------|--------------------|--------|-------|--------------------|--------|-------|
|                     | Sample size<br>(n) | t      | p     | Sample<br>size (n) | t      | p     |
| llp1                | 16                 | -1.420 | 0.166 | 16                 | -0.334 | 0.740 |
| llp2                | 16                 | 1.432  | 0.164 | 16                 | 0.767  | 0.450 |
| InR1                | 16                 | -0.470 | 0.642 | 16                 | 1.454  | 0.156 |
| InR2                | 16                 | 0.283  | 0.780 | 16                 | 1.796  | 0.08  |
| AKH                 | 16                 | 1.623  | 0.115 | 16                 | 1.452  | 0.157 |
| AKHR                | 16                 | 0.690  | 0.496 | 16                 | 0.987  | 0.331 |
| vg                  | N/A                | N/A    | N/A   | 16                 | -0.429 | 0.671 |

**Table S2:** Candidate gene primers

| Gene Names | Forward Primers        | Reverse Primers        |
|------------|------------------------|------------------------|
| ILP1       | TCAAAACGGCCATGTTTCAG   | TGAGACTTTTTTCGAGCACAGC |
| ILP2       | TTCCAGAAATGGAGATGGATG  | TAGGAGCGCAACTCCTCTGT   |
| InR1       | GGATCTGGTGTGGGACAGTT   | ATCCCCACGTTCGAGTATCTG  |
| InR2       | GGGAAGAACATCGTGAAGGA   | CATCACGAGCAGCGTGTACT   |
| AKH        | CGTAAGCTTCGACCAAGTTTTT | CATTCGACAACTCCGATCCT   |
| AKHR       | ATAATCACCACCACGGGATT   | GACCTTCGTTGAATCGCATA   |
| vg         | GTTGGAGAGCAACATGCAGA   | TCGATCCATTCTTGATGGT    |
| TYR1       | GTTCGTCGTATGCTGGTTGC   | GTAGATGAGCGGGTTGAGGG   |
